# Supplementary material
Source: publisher figshare collection journal article supplement (https://gsajournals.figshare.com/ndownloader/files/25800077)
Supplement: Supplementary file 1 [file 25800077]

## Sheet: PhenotypeCategory
		RNAi results
EYE DIFFERENTIATION CLUSTER 2
Φ category	Targeted gene	Expression Pattern	Strongest eye phenotype (ey>RNAi, dcr2)	Nb RNAi Φ /	min s19	Eye phenotype
				Nb RNAi tested		(GMR>RNAi, dcr2)
STRONG Φ > 1RNAi	crc (*)	homogeneous or ant MF (this work)	semi-lethal (no head), no eye	2/4	0.99	ND		RNAi phenotype Cluster 2
	Hmx (*)	posterior MF (this work)	lethal (no head)	2/4	0.07	ND			Nb of genes tested	Nb of genes with Φ upon down-regulation	% of genes with Φ upon down-regulation
	dpr12	posterior MF (this work)	small, rough	2/6	0.96	small, rough, glassy		post MF	21	6	28.5714
	nerfin-1 (*)	posterior MF (Stivers, 2000)	small, rough	2/4	1	disorganized		DBP	36	8	22.2222
STRONG Φ 1RNAi	CG7206	posterior MF (this work)	no eye	1/3	(TRIP)	no phenotype			57	14
	l(3)neo38 (*)	posterior MF (this work)	small, rough	1/4	(TRIP)	no phenotype
	CG31619	posterior MF (this work)	small, rough	1/3	1	small, glassy
	Eip75B (*)	homogeneous or undetermined (this work)	small, rough, depigmentation	2/5	0.99	ND
	Eip93F (*)	homogeneous or undetermined (this work)	small, glassy, depigmentation	4/4	0.99	ND
WEAK Φ 1RNAi	SoxN (*)	posterior MF (Cremazy, 2001)	rough	1/2	(TRIP)	rough (only 1/3 fly)
	CG15522	posterior MF (this work)	rough	1/3	1	small, rough
	Lim3 (*)	posterior MF (Roignant, 2010)	rough	1/5	(TRIP)	no phenotype
	rdo	posterior MF (this work)	disorganized	1/1	0.98	disorganized
	CenG1A	posterior MF (this work)	disorganized	1/3	1	rough
CLUSTER 4
Φ category	Targeted gene	Expression Pattern	Strongest eye phenotype (ey>RNAi, dcr2)	Nb RNAi Φ /	min s19
				Nb RNAi tested
STRONG Φ > 1RNAi	Smr (*)	homogeneous or undetermined (this work)	lethal (no head)	3/4	0.99
	CG3407 (*)	homogeneous or undetermined (this work)	small, rough	2/2	1
WEAK Φ > 1 RNAi	hang (*)	anterior MF (this work)	disorganized	2/5	1
WEAK Φ 1 RNAi	CG6791 (*)	homogeneous or undetermined (this work)	rough	1/3	0.91
ANTERIOR TO THE MF CLUSTER 9
Φ category	Targeted gene	Expression Pattern	Strongest eye phenotype (ey>RNAi, dcr2)	Nb RNAi Φ /	min s19
				Nb RNAi tested
STRONG Φ > 1RNAi	CG15514 (*)	homogeneous or anterior MF (this work)	small, rough	3/3	0.99
	crp (*)	homogeneous or undetermined (this work)	small, rough	3/5	1
WEAK Φ 1 RNAi	CG1832 (*)	anterior MF? (this work)	rough	2/3	1
	fd68A (*)	homogeneous or anterior MF (this work)	disorganized	2/3	0.97
	E(bx) (*)	homogeneous or anterior MF (this work)	disorganized	1/2	(TRIP)
CLUSTER 10
Φ category	Targeted gene	Expression Pattern	Strongest eye phenotype (ey>RNAi, dcr2)	Nb RNAi Φ /	min s19
				Nb RNAi tested
STRONG Φ > 1RNAi	fs(1)h (*)	homogeneous or undetermined (this work)	lethal (no head)	7/7	0.99
(*) putative DNA binding proteins
